# Supplementary material
Source: publisher figshare collection journal article supplement (https://diabetesjournals.figshare.com/ndownloader/files/28431990)
Supplement: Supplementary file 1 [file 28431990]

**Supplemental Table 1. Clinical characteristics of study subjects.**

| Parameter                | Value       |
|--------------------------|-------------|
| n                        | 17          |
| Age [years]              | 46.4 ± 2.4  |
| Body weight [kg]         | 99.8 ± 1.9  |
| BMI [kg/m <sup>2</sup> ] | 32.9 ± 0.5  |
| Waist circumference [cm] | 111.2 ± 1.7 |
| Waist to hip ratio       | 1.01 ± 0.01 |
| Total body fat [%]       | 33.1 ± 1.2  |
| Fasting glucose [mg/dl]  | 90.4 ± 1.4  |
| Fasting insulin [mU/l]   | 12.8 ± 1.7  |
| HOMA-IR                  | 2.89 ± 0.40 |

Data are shown as mean± SEM

**Supplemental Table 2. Primers used for real-time qPCR and promoter mutagenesis**

| Gene                                               | Primer name | Sequence                       |
|----------------------------------------------------|-------------|--------------------------------|
| <b>Human qPCR primers</b>                          |             |                                |
| <i>NR1D1</i> (REV- <i>ERB<math>\alpha</math></i> ) | NR1D1_F1    | 5'-CCAGCAATGTCGCTTCAAGAA-3'    |
|                                                    | NR1D1_R1    | 5'-TCTGCATCTCAGCAAGCATCC-3'    |
| <i>NR1D2</i> (REV- <i>ERB<math>\beta</math></i> )  | NR1D2_F     | 5'-CAGATGTCAGCAATGTCGCTTC-3'   |
|                                                    | NR1D2_R     | 5'-GCATCCTCTGTTTTTCACGCTT-3'   |
| <i>PER1</i>                                        | PER1_F      | 5'-ATTCCGCCTAACCCCGTATGT-3'    |
|                                                    | PER1_R      | 5'-CCGCGTAGTGAAAATCCTCTTG-3'   |
| <i>PER2</i>                                        | PER2_F      | 5'-AGCAGGTGAAAGCCAATGAAG-3'    |
|                                                    | PER2_R      | 5'-AGGTAACGCTCTCCATCTCCTC-3'   |
| <i>PER3</i>                                        | PER3_F      | 5'-GTCCAAGCCTTACAAGCTGGTTT-3'  |
|                                                    | PER3_R      | 5'-GACCGTCCATTTGTTGGCAT-3'     |
| <i>CLOCK</i>                                       | CLOCK_F     | 5'-ATTCCACAAGGCATGTCCCA-3'     |
|                                                    | CLOCK_R     | 5'-TTTGCTTCTATCATGCGTGTCC-3'   |
| <i>BMAL1</i>                                       | BMAL1_F     | 5'-CATTAAAGAGGTGCCACCAATCC-3'  |
|                                                    | BMAL1_R     | 5'-CAAAAATCCATCTGCTGCCC-3'     |
| <i>CRY1</i>                                        | CRY1_F      | 5'-GGGACCTGTGGATTAGTTGGG-3'    |
|                                                    | CRY1_R      | 5'-GCTCCAATCTGCATCAAGCAA-3'    |
| <i>CRY2</i>                                        | CRY2_F      | 5'-TGCATCTGTTGACACTCATGATTC-3' |
|                                                    | CRY2_R      | 5'-GGTACTCCCCCAGCCCAG-3'       |

|              |            |                                  |
|--------------|------------|----------------------------------|
| <i>RORA</i>  | RORA_F     | 5'-ACAACCAGCGGGAGGTGA-3'         |
|              | RORA_R     | 5'-GTTTGGCAAACCTCCACCACA-3'      |
| <i>DBP</i>   | DBP_F      | 5'-GAAAAATCCAGGTGCCGGA-3'        |
|              | DBP_R      | 5'-CGTTGTTCTTGTACCGCCG-3'        |
| <i>TEF</i>   | TEF_F      | 5'-AACCGTGTCCAGCACAGAATCT-3'     |
|              | TEF_R      | 5'-GGTCCGGATTGAAGTTCACATC-3'     |
| <i>RPLP0</i> | QT00075012 | QuantiTect Primer Assay (Qiagen) |

#### Mouse qPCR primers

|              |            |                                  |
|--------------|------------|----------------------------------|
| <i>Bmal1</i> | QT00101647 | QuantiTect Primer Assay (Qiagen) |
| <i>Clock</i> | QT00197547 | QuantiTect Primer Assay (Qiagen) |
| <i>Cry1</i>  | QT00117012 | QuantiTect Primer Assay (Qiagen) |
| <i>Cry2</i>  | QT00168868 | QuantiTect Primer Assay (Qiagen) |
| <i>Dbp</i>   | QT00103089 | QuantiTect Primer Assay (Qiagen) |
| <i>NR1D1</i> | QT00164556 | QuantiTect Primer Assay (Qiagen) |
| <i>Per1</i>  | QT00113337 | QuantiTect Primer Assay (Qiagen) |
| <i>Per2</i>  | QT00198366 | QuantiTect Primer Assay (Qiagen) |
| <i>c-Fos</i> | QT00147308 | QuantiTect Primer Assay (Qiagen) |
| 36B4         | fw36B4     | TCATCCAGCAGGTGTTTGACA            |
|              | rv36B4     | GGCACCGAGGCAACAGTT               |

#### Promoter mutagenesis primers

|             |                  |                                                     |
|-------------|------------------|-----------------------------------------------------|
| mPer2-CRE   | mPer2-CRE-MUT fw | CCAGAACAATGTAGCCACCATTGAATTCAATGTAAGCGAGGAAAC       |
|             | mPer2-CRE-MUT rv | GTTTCCTCGCTTACATTGAATTCAATGGTGGCTACATTGTTCTGG       |
| mPer2-E-BOX | mPer2-E-BOX fw   | GGGCGGGGCTCAGCGCGCGCGGTGCTAGTTTCCACTATGTGACAGCGGAGG |

|               |                |                                                   |
|---------------|----------------|---------------------------------------------------|
|               | mPer2-E-BOX rv | CCTCCGCTGTACATAGTGGAAACTAGCACCGCGCGCGCTGAGCCCGCCC |
| mPer2-NFY     | fw_NFY_mut     | GGCACTCCGACCAAAGGCGCGCGCA                         |
|               | rv_NFY_mut     | TGCGCGCGCCTTTGGTCGGAGTGCC                         |
| mPer2-SP1     | fw_SP1_mut     | CAATGGCGCGCGCAGGTTTGGGCTCAGCGCGCGCG               |
|               | rv_SP1_mut     | CGCGCGCGCTGAGCCCAAACCTGCGCGCGCCATTG               |
| mPer2-NFY-SP1 | fw_NFY_SP1_mut | GCACTCCGACCAAAGGCGCGCGCAGGTTTGGGCTCAGCGCGCGCG     |
|               | rv_NFY_SP1_mut | CGCGCGCGCTGAGCCCAAACCTGCGCGCGCCTTTGGTCGGAGTGC     |

---

**Supplemental Table 3. Signaling pathways affected in adipose tissue upon the saline infusion and the euglycemic hyperinsulinemic clamp**

| KEGG ID                | Pathway name                            | Gene number (total) | %    | P-value | Genes                                                                                                                                                     |
|------------------------|-----------------------------------------|---------------------|------|---------|-----------------------------------------------------------------------------------------------------------------------------------------------------------|
| <b>Saline infusion</b> |                                         |                     |      |         |                                                                                                                                                           |
| hsa04310               | Wnt signaling pathway                   | 11 (141)            | 7.8  | 0.0007  | CXXC4, AXIN2, FZD10, BAMBI, CACYBP, TCF7, SOX17, PRICKLE2, WNT11, NFATC1, DAAM1                                                                           |
| hsa04934               | Cushing syndrome                        | 10 (152)            | 6.6  | 0.0043  | ATF4, AXIN2, AGTR1, FZD10, TCF7, ITPR1, CDK2, LDLR, WNT11, GNAI3                                                                                          |
| hsa05200               | Pathways in cancer                      | 22 (499)            | 4.4  | 0.0054  | ZBTB16, JAK2, AXIN2, AGTR1, FZD10, EDNRB, JAK3, IL12RB1, NOTCH1, SMO, TCF7, FGF18, CDK2, BCL2L11, TGFB2, HSP90AB1, RASSF5, WNT11, GNAI3, GNG7, HES5, RARA |
| hsa05203               | Viral carcinogenesis                    | 11 (193)            | 5.7  | 0.0081  | HIST1H2BB, YWHAB, ATF4, YWHAQ, HIST1H2BG, HDAC6, JAK3, MAD1L1, YWHAB, CDK2, HIST1H2BD, REL                                                                |
| hsa04390               | Hippo signaling pathway                 | 9 (151)             | 6.0  | 0.0122  | YWHAB, YWHAQ, AXIN2, CCN2, FZD10, YWHAB, SMAD7, TCF7, TGFB2, WNT11                                                                                        |
| hsa05202               | Transcriptional misregulation in cancer | 10 (180)            | 5.6  | 0.0135  | ZBTB16, CEBPB, PER2, PLAU, FUT8, SIN3A, HHEX, CDK14, REL, RARA                                                                                            |
| hsa04659               | Th17 cell differentiation               | 7 (106)             | 6.6  | 0.0156  | JAK2, NFKBIE, JAK3, IL12RB1, HSP90AB1, NFATC1, RARA                                                                                                       |
| hsa05217               | Basal cell carcinoma                    | 5 (62)              | 8.1  | 0.0181  | AXIN2, FZD10, SMO, TCF7, WNT11                                                                                                                            |
| hsa03060               | Protein export                          | 3 (23)              | 13.0 | 0.0183  | SEC61B, SRPRB, SEC63                                                                                                                                      |
| hsa04658               | Th1 and Th2 cell differentiation        | 6 (89)              | 6.7  | 0.0224  | JAK2, NFKBIE, JAK3, IL12RB1, NOTCH1, NFATC1                                                                                                               |
| hsa04933               | AGE-RAGE signaling pathway in           | 6 (95)              | 6.3  | 0.0297  | JAK2, AGTR1, EDN1, PLCD4, TGFB2, NFATC1                                                                                                                   |

diabetic complications

|          |                                                          |         |      |        |                                                              |
|----------|----------------------------------------------------------|---------|------|--------|--------------------------------------------------------------|
| hsa04916 | Melanogenesis                                            | 6 (98)  | 6.1  | 0.0339 | FZD10, EDN1, EDNRB, TCF7, WNT11, GNAI3                       |
| hsa04710 | Circadian rhythm                                         | 3 (30)  | 10.0 | 0.0370 | PER2, NR1D1, PER1, NR1D1                                     |
| hsa00533 | Glycosaminoglycan biosynthesis                           | 2 (13)  | 15.4 | 0.0396 | FUT8, B3GNT2                                                 |
| hsa05206 | MicroRNAs in cancer                                      | 8 (157) | 5.1  | 0.0403 | DDIT4, FOXP1, RDX, PLA1, NOTCH1, SOX4, BCL2L11, TGFB2, SOX4, |
| hsa04915 | Estrogen signaling pathway                               | 7 (130) | 5.4  | 0.0417 | FKBP5, ATF4, HSPA8, ITPR1, HSP90AB1, GNAI3, RARA             |
| hsa04550 | Signaling pathways regulating pluripotency of stem cells | 7 (134) | 5.2  | 0.0478 | JAK2, ID3, AXIN2, FZD10, JAK3, WNT11, LIFR, LIFR             |

**Euglycemic hyperinsulinemic clamp**

|          |                                                  |          |      |                       |                                                                                                                                                                                                                           |
|----------|--------------------------------------------------|----------|------|-----------------------|---------------------------------------------------------------------------------------------------------------------------------------------------------------------------------------------------------------------------|
| hsa05202 | Transcriptional misregulation in cancer          | 18 (180) | 10.0 | 1.08x10 <sup>-5</sup> | ZBTB16, GADD45B, CEBPB, BCL11B, PER2, CEBPE, SP1, CEBPA, MAF, CEBPB, HHEX, HOXA9, LMO2, BCL6, SIX1, CEBPA, SIN3A, HOXA10, GRIA3, RARA                                                                                     |
| hsa04713 | Circadian entrainment                            | 10 (93)  | 10.8 | 0.0006                | PER2, PLCB1, PER1, ITPR1, CAMK2G, PER3, RASD1, GNAI3, PLCB1, GNG7, GRIA3                                                                                                                                                  |
| hsa05200 | Pathways in cancer                               | 28 (499) | 5.6  | 0.0016                | MSH2, ZBTB16, GLI1, RAC3, GADD45B, PIK3R1, AXIN2, PTGER4, PTGER2, NKX3-1, FZD10, NCOA3, SP1, CEBPA, IL7R, FGF18, NOTCH1, PLCB1, FZD4, LAMA2, FGF18, CAMK2G, FZD5, HSP90AB1, RASSF5, CEBPA, GNAI3, PLCB1, GNG7, HES5, RARA |
| hsa04750 | Inflammatory mediator regulation of TRP channels | 9 (93)   | 9.7  | 0.0023                | PLA2G4A, MAP2K3, PIK3R1, PTGER4, PTGER2, TRPV1, PLCB1, ITPR1, CAMK2G, PLCB1                                                                                                                                               |
| hsa04915 | Estrogen signaling pathway                       | 11 (130) | 8.5  | 0.0023                | FKBP4, PIK3R1, CREB5, NCOA3, SP1, PLCB1, GPER1, ITPR1, HSP90AB1, GNAI3, CREB5, CREB5, PLCB1, CREB5, RARA                                                                                                                  |
| hsa04152 | AMPK signaling pathway                           | 10 (118) | 8.5  | 0.0036                | SREBF1, PIK3R1, CREB5, RPTOR, PPP2R3B, PFKFB3, IRS2,                                                                                                                                                                      |

|          |                                       |          |      |        |                                                                                                         |
|----------|---------------------------------------|----------|------|--------|---------------------------------------------------------------------------------------------------------|
|          |                                       |          |      |        | PFKFB3, CREB5, CAB39L, CREB5, TBC1D1, PPP2R1B, CREB5                                                    |
| hsa04310 | Wnt signaling pathway                 | 11 (141) | 7.8  | 0.0044 | RAC3, AXIN2, FZD10, CTNNBIP1, PLCB1, FZD4, CACYBP, CAMK2G, FZD5, PRICKLE2, PLCB1, NKD1                  |
| hsa05224 | Breast cancer                         | 11 (141) | 7.8  | 0.0044 | GADD45B, PIK3R1, AXIN2, FZD10, NCOA3, SP1, FGF18, NOTCH1, FZD4, FGF18, FZD5, HES5                       |
| hsa04725 | Cholinergic synapse                   | 9 (110)  | 8.2  | 0.0071 | KCNJ14, PIK3R1, CREB5, PLCB1, ITPR1, CAMK2G, KCNJ12, GNAI3, CREB5, CREB5, PLCB1, GNG7, CREB5            |
| hsa04730 | Long-term depression                  | 6 (56)   | 10.7 | 0.0076 | PLA2G4A, PLCB1, ITPR1, GNAI3, PLCB1, PPP2R1B, GRIA3                                                     |
| hsa04934 | Cushing syndrome                      | 11 (152) | 7.2  | 0.0077 | AXIN2, CREB5, FZD10, SP1, PLCB1, FZD4, ITPR1, CAMK2G, FZD5, RASD1, GNAI3, CREB5, CREB5, PLCB1, CREB5    |
| hsa04070 | Phosphatidylinositol signaling system | 8 (96)   | 8.3  | 0.0098 | PI4KB, PIK3R1, PIK3C2B, IP6K2, PLCD3, PLCB1, ITPR1, PIK3C3, PLCB1                                       |
| hsa05217 | Basal cell carcinoma                  | 6 (62)   | 9.7  | 0.0123 | GLI1, GADD45B, AXIN2, FZD10, FZD4, FZD5                                                                 |
| hsa04924 | Renin secretion                       | 6 (63)   | 9.5  | 0.0132 | PTGER4, PTGER2, ADRB1, PLCB1, ITPR1, GNAI3, PLCB1                                                       |
| hsa04710 | Circadian rhythm                      | 4 (30)   | 13.3 | 0.0133 | PER2, NR1D1, PER1, NR1D1, PER3                                                                          |
| hsa05221 | Acute myeloid leukemia                | 6 (64)   | 9.4  | 0.0142 | ZBTB16, PIK3R1, PER2, CEBPE, CEBPA, CEBPA, RARA                                                         |
| hsa00051 | Fructose and mannose metabolism       | 4 (32)   | 12.5 | 0.0166 | GMPPB, MPI, SORD, PFKFB3, PFKFB3, SORD                                                                  |
| hsa04728 | Dopaminergic synapse                  | 9 (128)  | 7.0  | 0.0181 | CREB5, PPP2R3B, PLCB1, ITPR1, CAMK2G, GNAI3, CREB5, CREB5, PLCB1, PPP2R1B, GNG7, GRIA3, CREB5           |
| hsa04024 | cAMP signaling pathway                | 12 (195) | 6.2  | 0.0184 | GLI1, RAC3, PIK3R1, PTGER2, CREB5, SOX9, SSTR2, ADRB1, PDE4B, CAMK2G, GNAI3, CREB5, CREB5, GRIA3, CREB5 |
| hsa04390 | Hippo signaling pathway               | 10 (151) | 6.6  | 0.0192 | YWHAQ, AXIN2, SCRIB, PRKCI, CCN2, FZD10, FZD4, FZD5, PPP2R1B, NKD1                                      |

|          |                                                          |          |     |        |                                                                                                                                                 |
|----------|----------------------------------------------------------|----------|-----|--------|-------------------------------------------------------------------------------------------------------------------------------------------------|
| hsa04550 | Signaling pathways regulating pluripotency of stem cells | 9 (134)  | 6.7 | 0.0237 | PIK3R1, AXIN2, FZD10, SMARCAD1, JARID2, FZD4, POU5F1, FZD5, LIFR                                                                                |
| hsa04916 | Melanogenesis                                            | 7 (98)   | 7.1 | 0.0327 | FZD10, EDN1, PLCB1, FZD4, CAMK2G, FZD5, GNAI3, PLCB1                                                                                            |
| hsa05165 | Human papillomavirus infection                           | 16 (315) | 5.1 | 0.0363 | PIK3R1, AXIN2, PTGER4, CREB5, SCRIB, PRKCI, FZD10, ITGA11, PPP2R3B, NOTCH1, FZD4, LAMA2, NFX1, FZD5, CREB5, ITGA11, CREB5, PPP2R1B, CREB5, HES5 |
| hsa04150 | mTOR signaling pathway                                   | 9 (146)  | 6.2 | 0.0382 | DDIT4, PIK3R1, FZD10, SESN2, RPTOR, FZD4, FZD5, FLCN, CAB39L                                                                                    |
| hsa04928 | Parathyroid hormone synthesis, secretion and action      | 7 (102)  | 6.9 | 0.0394 | AKAP13, CREB5, SP1, PLCB1, PDE4B, ITPR1, AKAP13, AKAP13, GNAI3, CREB5, CREB5, PLCB1, CREB5                                                      |
| hsa04664 | Fc epsilon RI signaling pathway                          | 5 (64)   | 7.8 | 0.0484 | PLA2G4A, MAP2K3, RAC3, PIK3R1, MS4A2                                                                                                            |

---

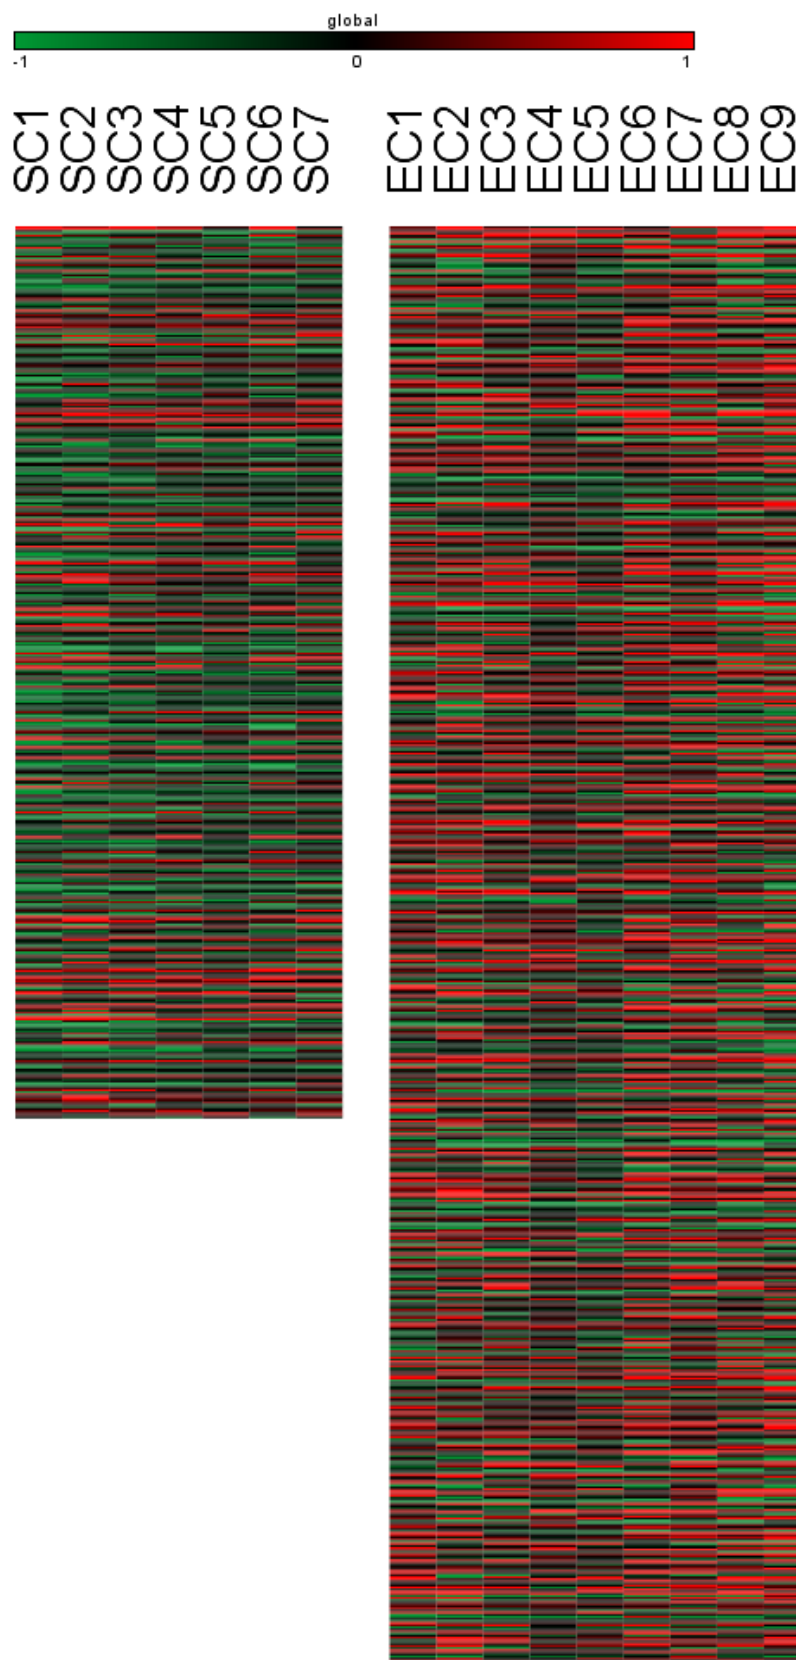

**Supplemental Figure 1. Heatmap representation of fold changes of all transcripts in SC and EC experiments depicted using a logarithmic color scale.** Expression decrease at 240 min in relation to -40 min value is shown in green and expression increase is shown in red. Heatmap was build using the GENE-E software (<https://software.broadinstitute.org/GENE-E/>).

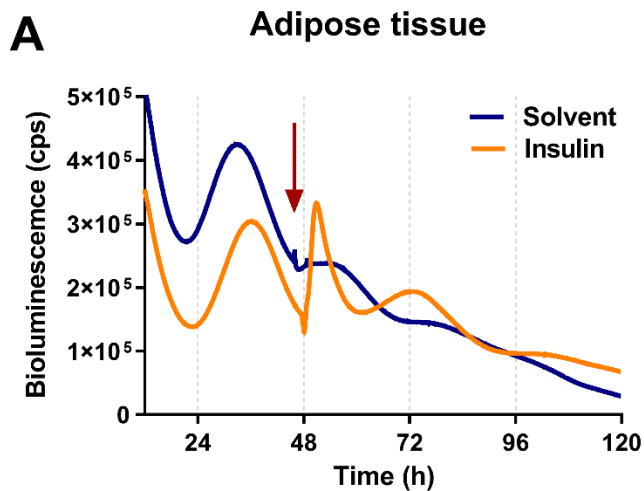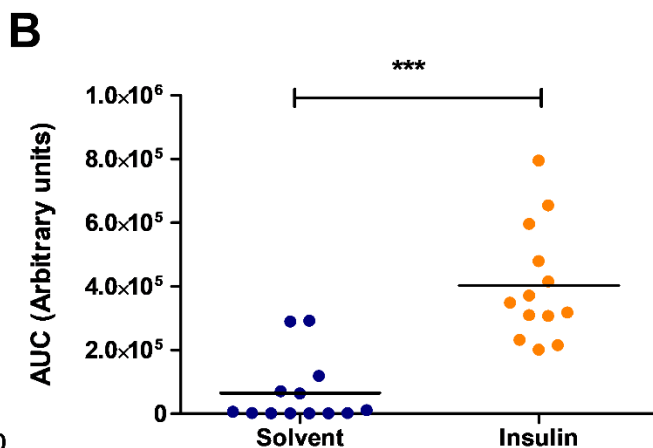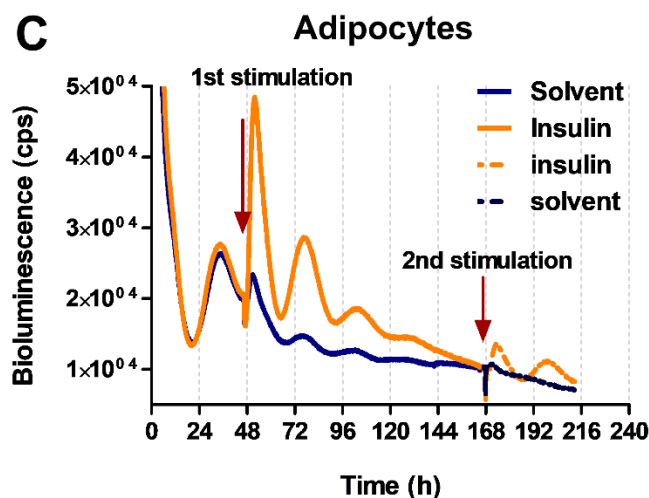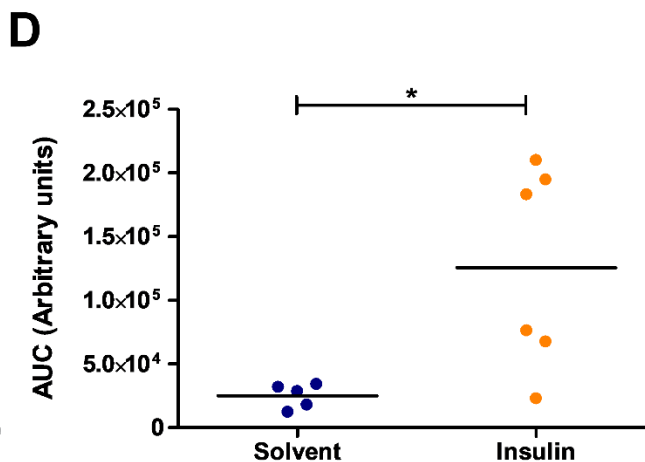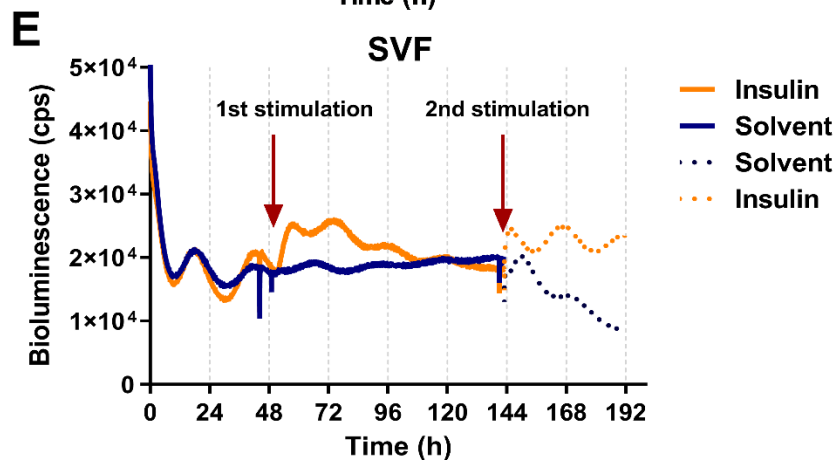

**Supplemental Figure 2. Insulin leads to an increase in mPER2::LUC activity in adipose tissue and isolated adipocytes.** Real-time bioluminescence recordings of epididymal adipose tissues explants (**A-B**), adipose tissue derived adipocytes (**C-D**) and stromal vascular fraction (**E**) from mPer2<sup>Luc</sup> mice. **A and C:** Adipose tissue (**A**) and adipocytes (**C**) were stimulated with either 100 nM insulin or solvent. The second stimulation with insulin was applied to firstly solvent stimulated cells and vice versa (**C**). Time of stimulation is indicated by the red arrow. Results of one representative experiment are shown. **B and D:** The area under the induction curve induced by the stimulation were determined. (**B**) Adipose tissue stimulation. Overall, n=13 for solvent and insulin in eight independent experiments; h=hours; stimulations were performed 3-4 h (n=2), 8-9 h (n=2), 11-12 h (n=3), 15-16 h (n=3), 20-21 h (n=2), or 23-24 h (n=1) after peak. Data are shown as mean. (**D**) Adipocyte stimulation. Stimulations were performed 1-12 hours after peak. n=5 for solvent and n=6 for insulin. Data are shown as mean. \*p<0.05, \*\*\*p<0.001 by the Mann-Whitney test. **E.** Stromal vascular fraction (SVF) derived from adipose tissue explants of PER2::LUC mice stimulated with 100nM insulin or solvent (red arrows).

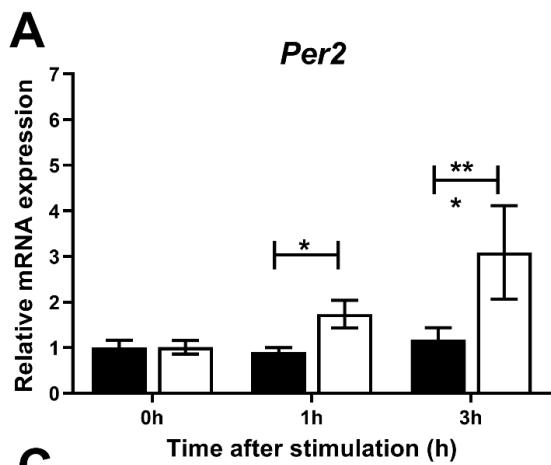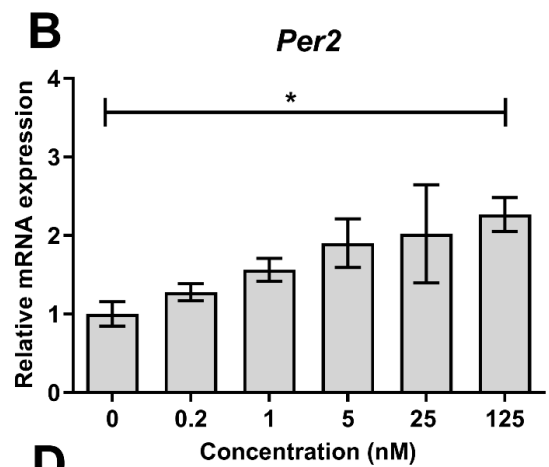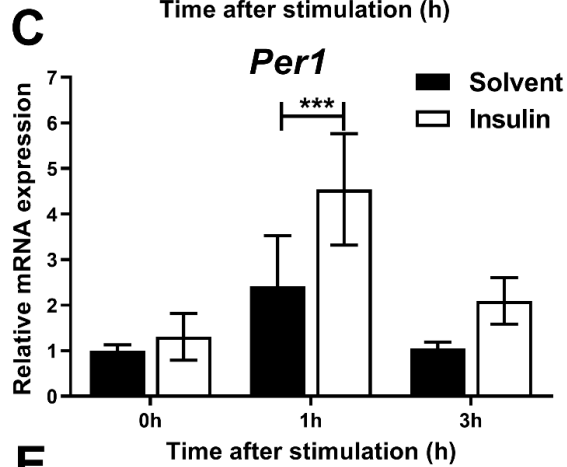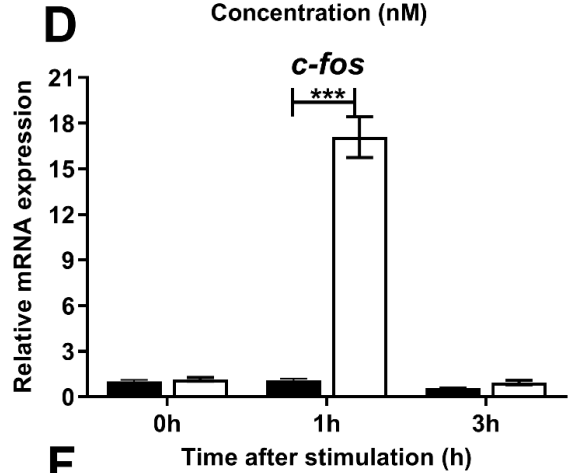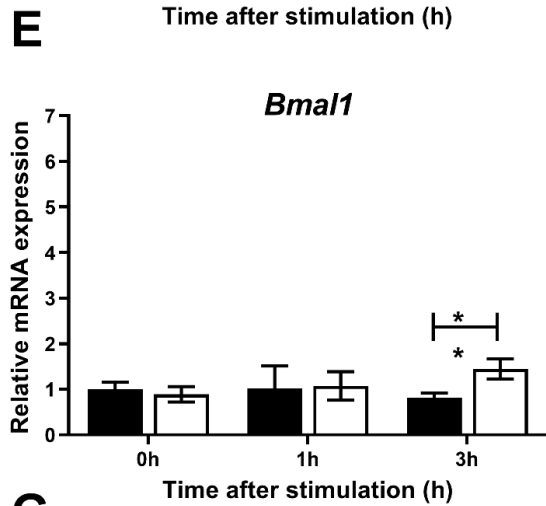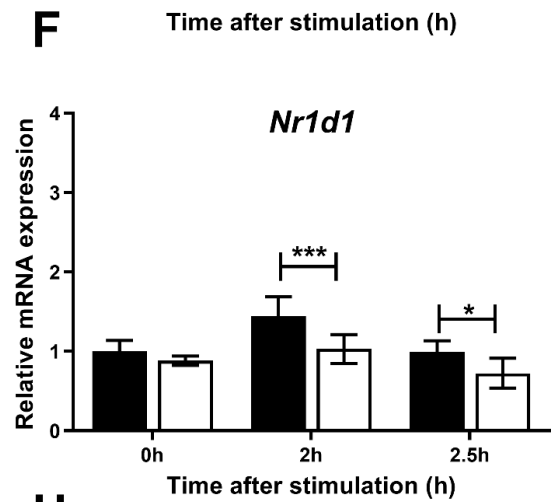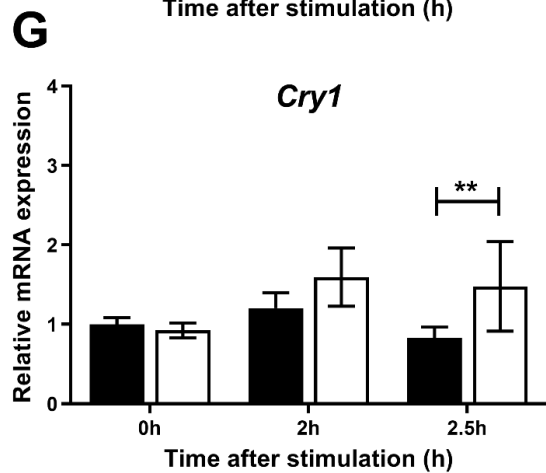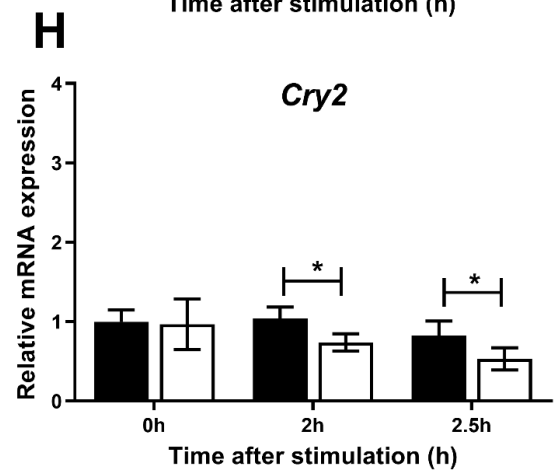

**Supplemental Figure 3. Insulin transcriptionally regulates clock genes and immediate early genes in 3T3L1 adipocytes.** 3T3-L1 adipocytes were serum starved for 24h and subsequently stimulated with either solvent or 100nM insulin for 1 - 3h (**A, C-H**). Expression of mRNA for *Per2* (**A**), *Per1* (**C**), *c-fos* (**D**), *Bmal1* (**E**), *Nr1d1* (**F**), *Cry1* (**G**), and *Cry2* (**H**) was determined with qPCR. (**B**) Concentration-dependent regulation of the *Per2* expression by insulin. Data show the results in mean $\pm$ SD of six biological replicates (n=6). \*p<0.05, \*\*p<0.01, \*\*\*p<0.001 by two-way ANOVA and Bonferroni post-hoc test.

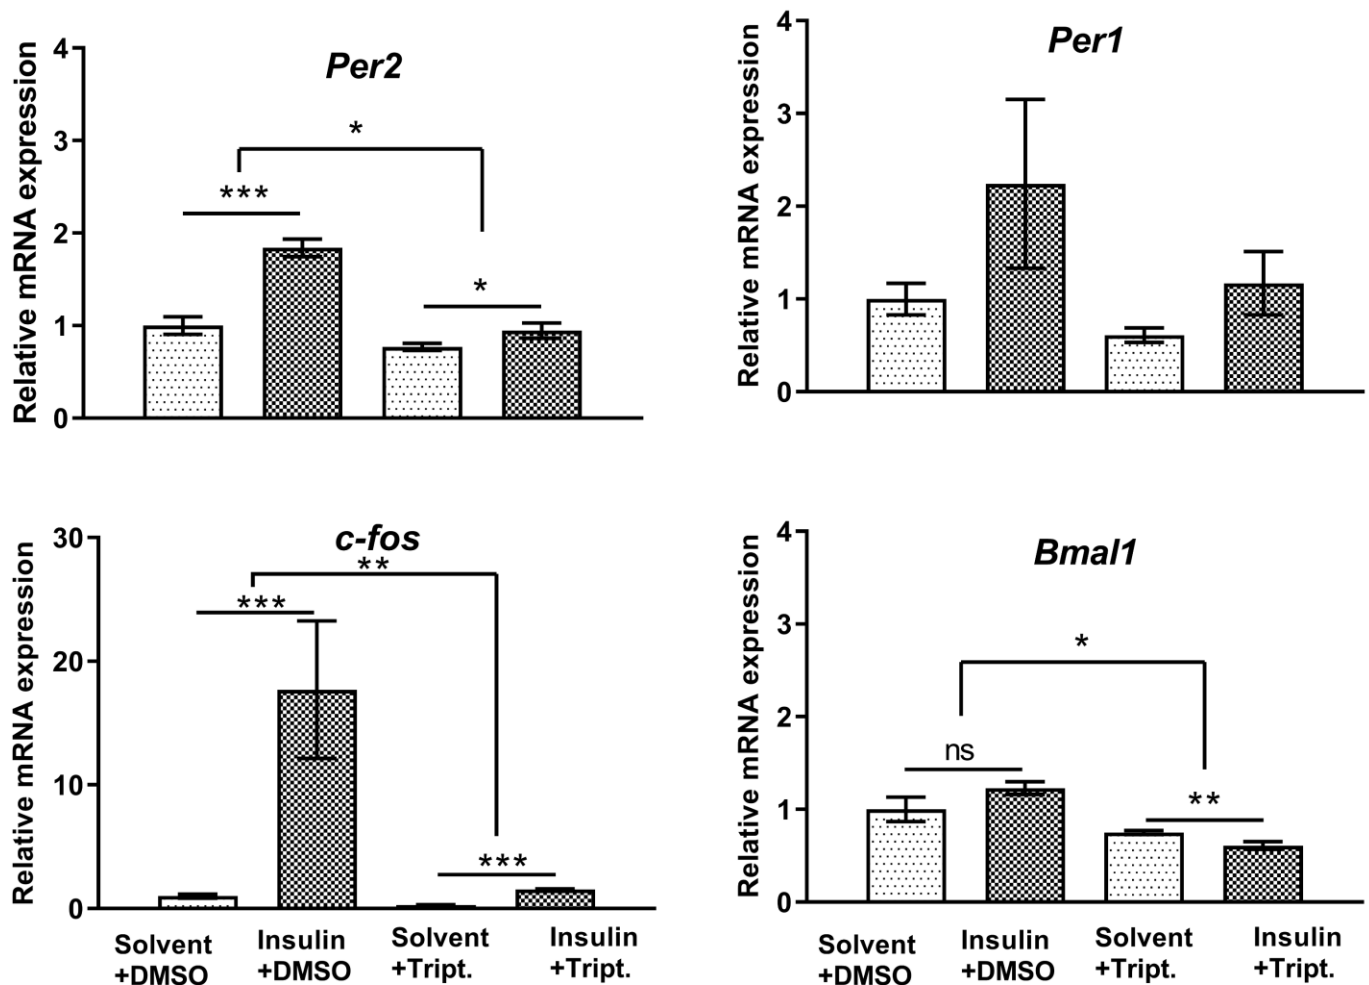

#### Supplemental Figure 4. RNA polymerase II blocker attenuates the insulin-dependent induction of clock gene expression.

3T3-L1 adipocytes were serum-starved for 24 hours and subsequently stimulated with either triptolide (Tript.) or its solvent DMSO during the treatment with 100 nM insulin or solvent for 1 hour (mPer1 and mc-fos) or 2 hours (mPer2 and mBmal1). The results are shown as mean  $\pm$  SD of one experiment with three technical replicates (n=3). Data was normalized to the treatment with solvent + DMSO. \*p<0.05, \*\*p<0.01, \*\*\*p<0.001 by Student's t test.

**A**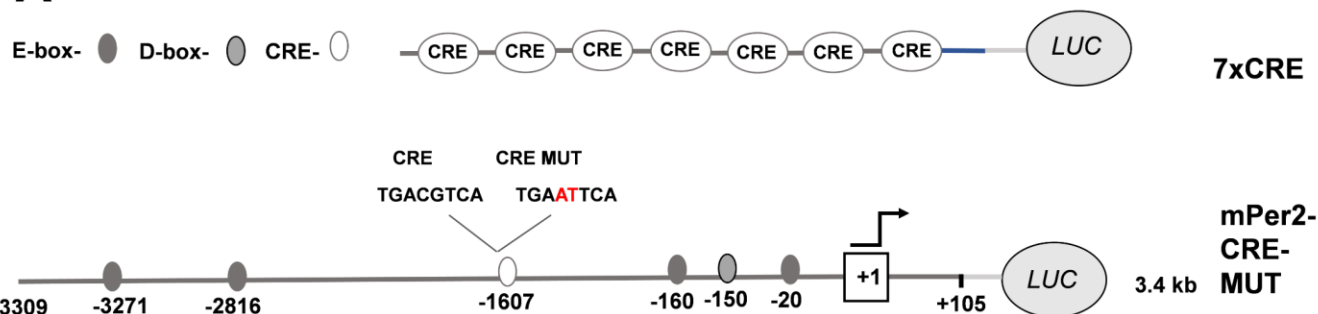**B**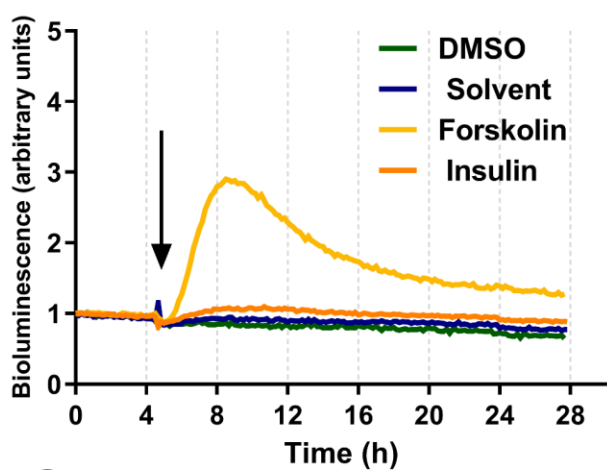**D**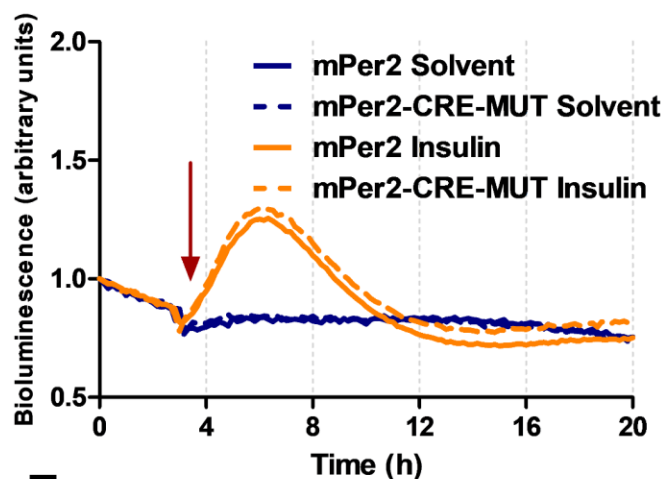**C**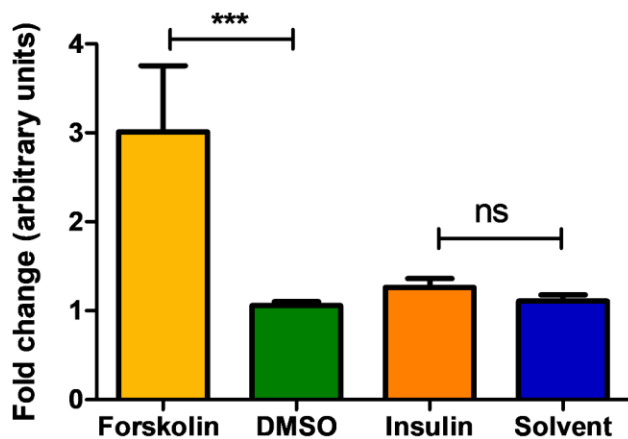**E**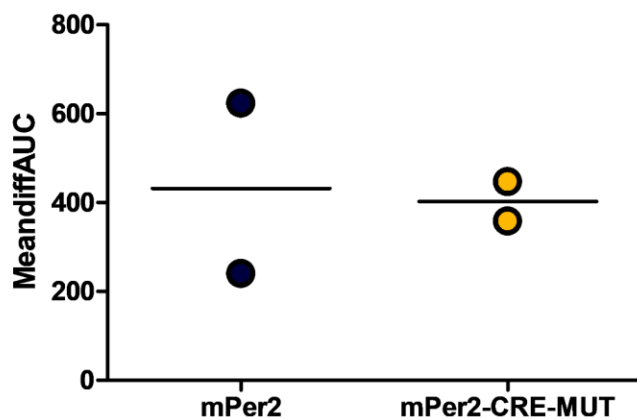

**Supplemental Figure 5. Insulin-inducible expression from the mPer2 promoter is CRE independent.** (A) Schematic representation of the 7xCRE reporter construct containing seven repeats of the Cyclic AMP Responsive Element (CRE) upstream of a minimal promoter (blue) fused to a luciferase (LUC) (above) and of the 3.4 kb mPer2 promoter reporter construct (below). The CRE binding site was mutated using site directed mutagenesis (red font, mPer2-CRE-MUT). **B and C:** Bioluminescence recordings of 3T3-L1 preadipocytes harboring the 7xCRE luciferase reporter construct. (B) Cells were stimulated with 10  $\mu$ M forskolin (n=2), DMSO (n=1), 100 nM insulin (n=3) or solvent (n=1) (time of stimulation indicated by the black arrow). Raw bioluminescence data are shown. (C). Fold change of luminescence after the stimulation (n=4). \*p<0.05, \*\*p<0.01, \*\*\*p<0.001 by Kruskal-Wallis test with Dunn's multiple comparison test. **D and E:** Bioluminescence recordings of 3T3-L1 pre-adipocytes harboring the mPer2- or the mPer2-CRE-MUT promoter luciferase reporter construct. (D). Cells were stimulated with either 100 nM insulin (n=3) or solvent (n=2) (time of stimulation indicated by the red arrow). Raw bioluminescence data are shown. (E). Mean difference of the area under the induction curve (MeandiffAUC) determined for each construct (n=2).

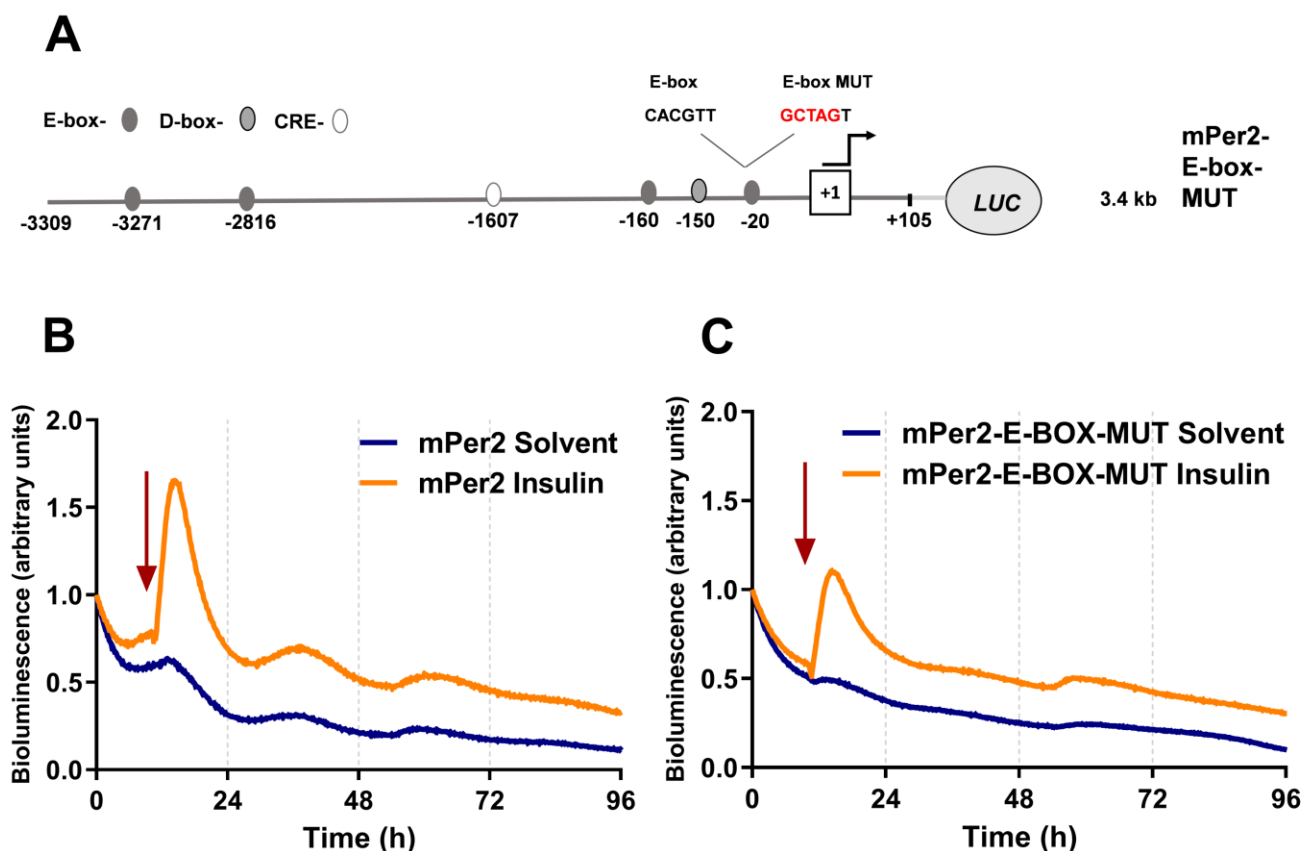

**Supplemental Figure 6. Insulin-inducible expression from the mPer2 promoter is E-box -20 independent.** (A) Schematic representation of the 3.4 kb mPer2 promoter reporter construct. The E-box, 20 bp upstream was mutated using site directed mutagenesis (red font). LUC: luciferase, MUT: mutation, +1 represent the transcriptional starting site. **B and C:** Real-time bioluminescence recordings of 3T3-L1 cells. 3T3-L1 preadipocytes harboring the mPer2- (B) or the mPer2-E-box-MUT (C) promoter luciferase reporter construct were stimulated with either 100 nM insulin or solvent (time of stimulation indicated by the red arrow) (n=2 biological replicates for each construct and treatment).

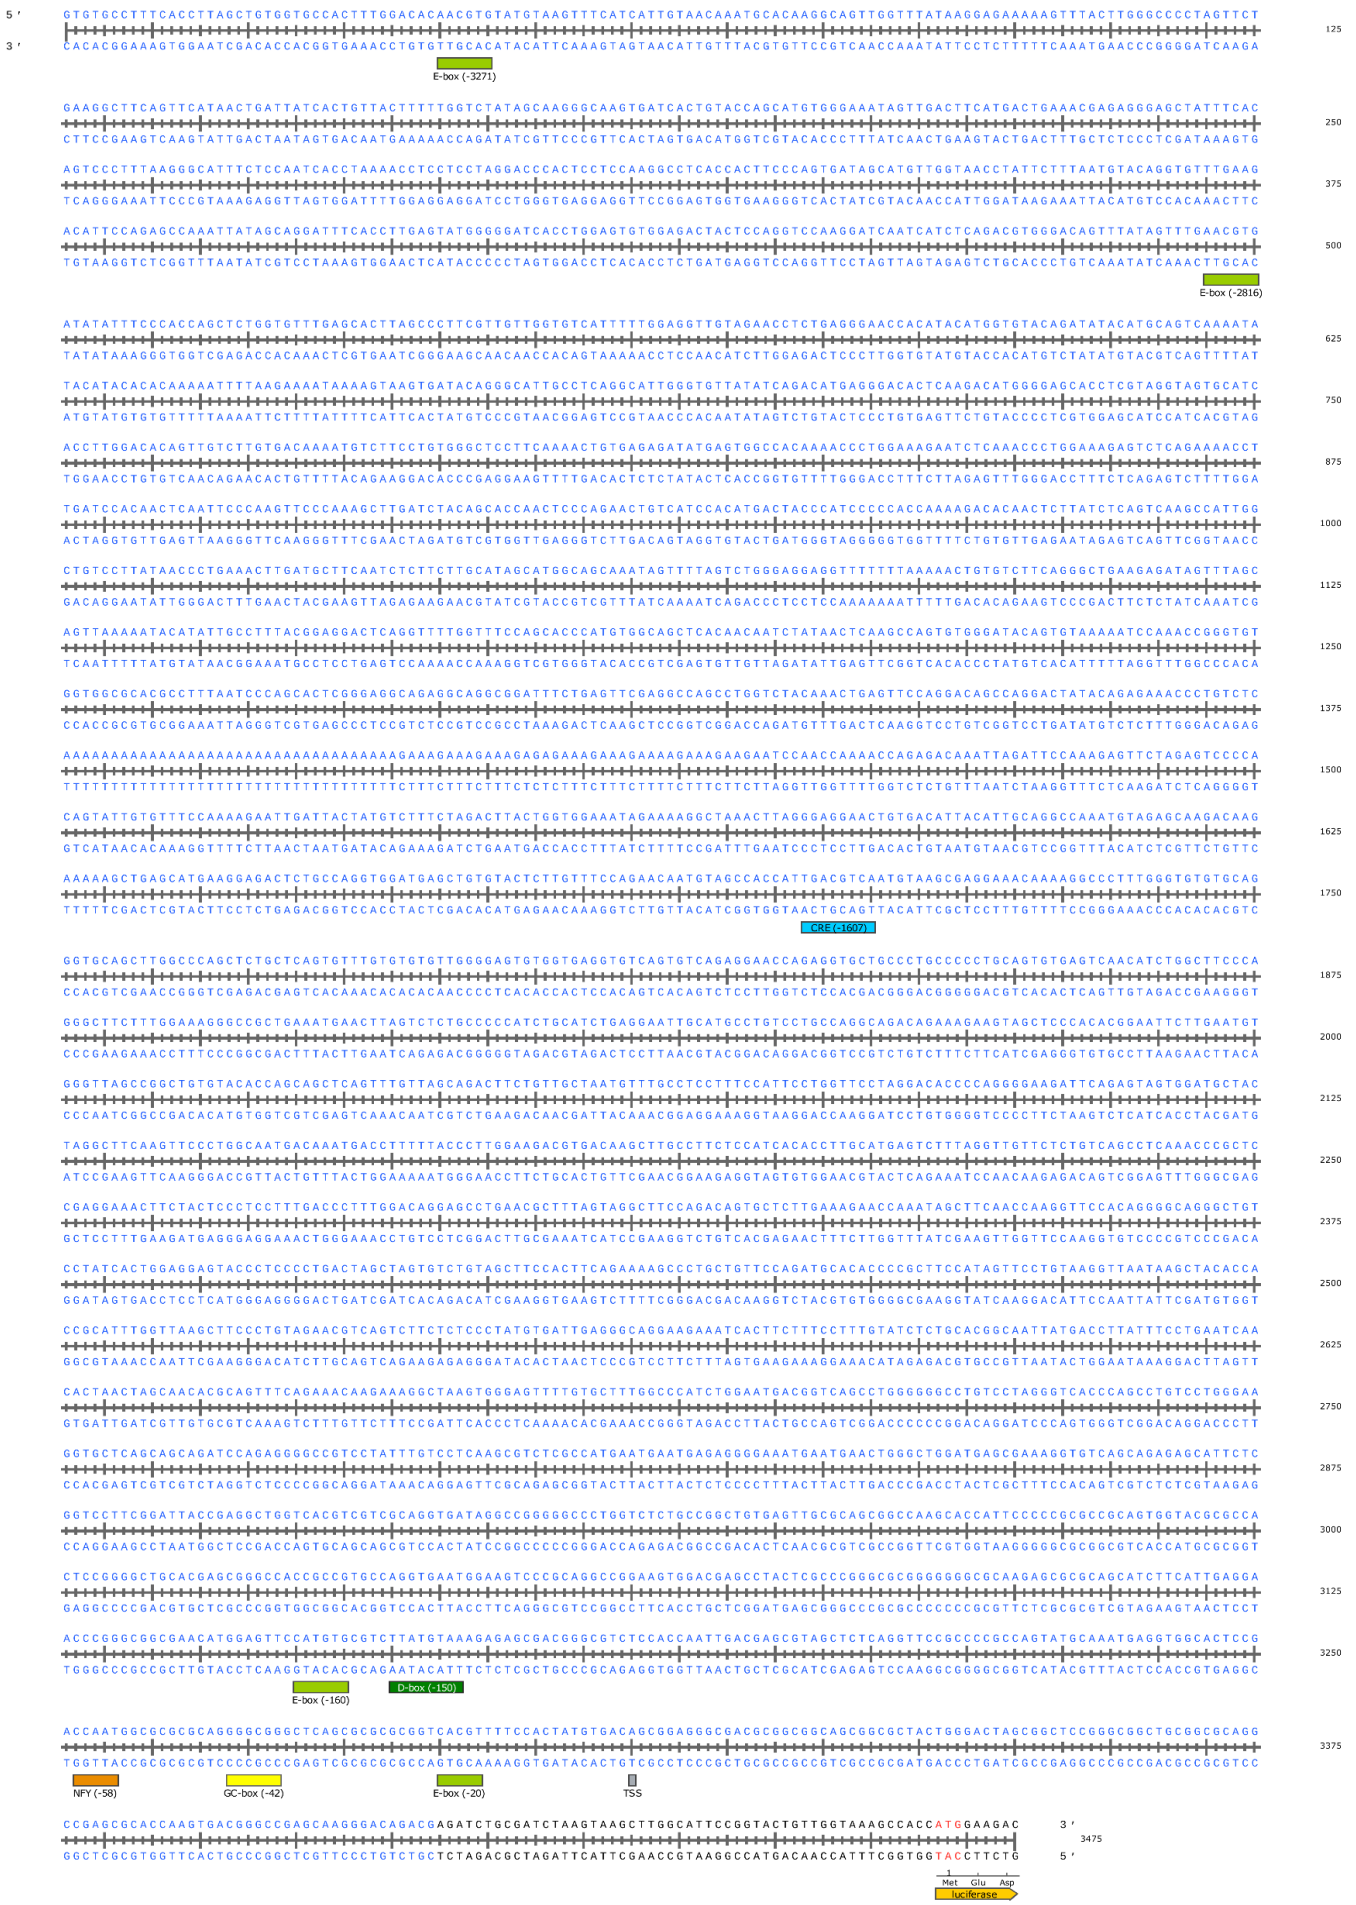

**Supplemental Figure 7. Mouse Per2 promoter sequence within a luciferase reporter construct.** Putative binding sites were screened using the MatInspector software and depicted using the SnapGene software (<https://www.snapgene.com/>). Per2 promoter sequence is indicated by the blue font and the translation start site of the luciferase gene is shown in red font. Binding sites are indicated using following colors: green - E-box (5'-CACGTT-3'), dark green - D- box (5'-TTATGTAA-3'), blue - CRE (5'-TGACGTCA-3'), orange – NFY (5'-CCAAT-3'), and yellow – GC-box/SP1 binding site (5'-GGGCGG-3'). TSS (transcription start site) is indicated with a grey box.

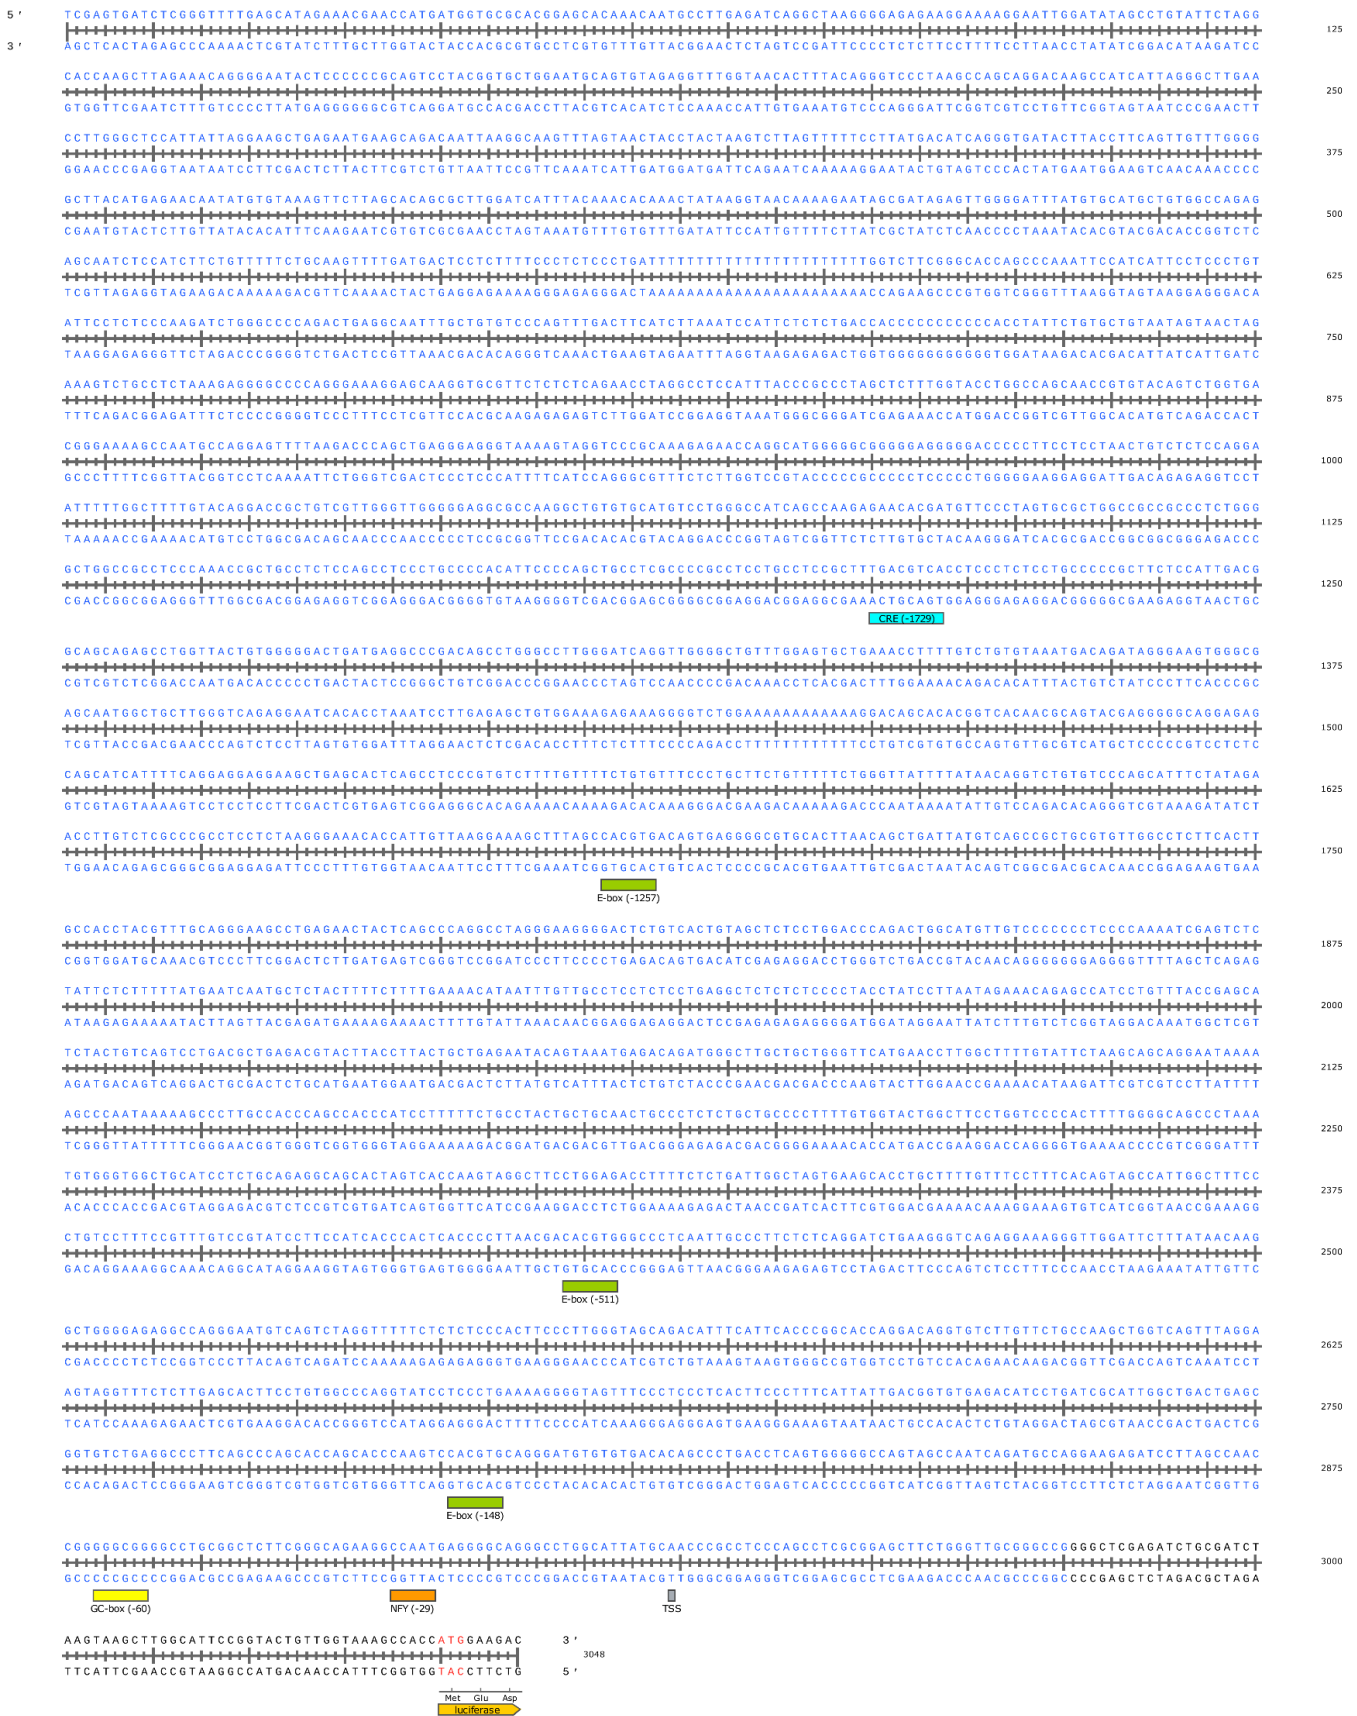

**Supplemental Figure 8. Mouse Per1 promoter sequence within a luciferase reporter construct.** Putative binding sites were screened using the MatInspector software and depicted using the SnapGene software (<https://www.snapgene.com/>). Per1 promoter sequence is indicated by the blue font and the translation start site of the luciferase gene is shown in red font. Binding sites are indicated using following colors: green - E-box (5'-CACGTT-3'), dark green - D- box (5'-TTATGTAA-3'), blue - CRE (5'-TGACGTCA-3'), orange – NFY (5'-CCAAT-3'), and yellow – GC-box/SP1 binding site (5'-GGGCGG-3'). TSS (transcription start site) is indicated with a grey box.

**A**

| Accession Number | Cell/Tissue | TFs                   |
|------------------|-------------|-----------------------|
| ENCFF659QAR      | Hep2G       | NFYA                  |
| ENCFF062IKU      | Hep2G       | NFYB                  |
| ENCFF117DNV      | Hep2G       | NFYC                  |
| ENCFF460NRJ      | Hep2G       | C/EBPalpha            |
| ENCFF000XQN      | Hep2G       | C/EBPbeta             |
| ENCFF616JYP      | Hep2G       | C/EBPdelta            |
| ENCFF517LOQ      | Hep2G       | SP1                   |
| GSE52496         | ESC         | SP1                   |
| GSE69099         | ESC         | C/EBPbeta             |
| GSE56839         | ESC         | NFYA, NFYB, NFYC      |
| GSE27826         | 3T3-L1      | C/EBPbeta, C/EBPdelta |

**B**

### Per1 promoter in mouse 3T3-L1

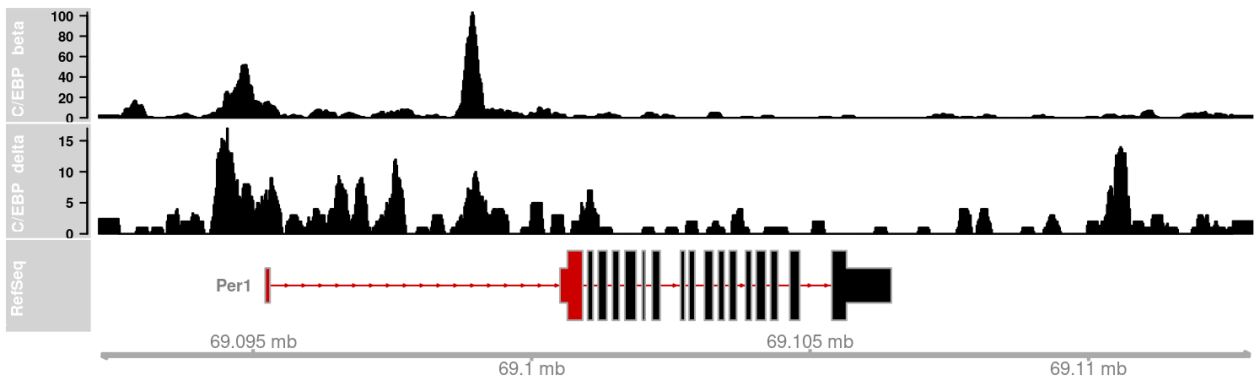

### Per2 promoter in mouse 3T3-L1

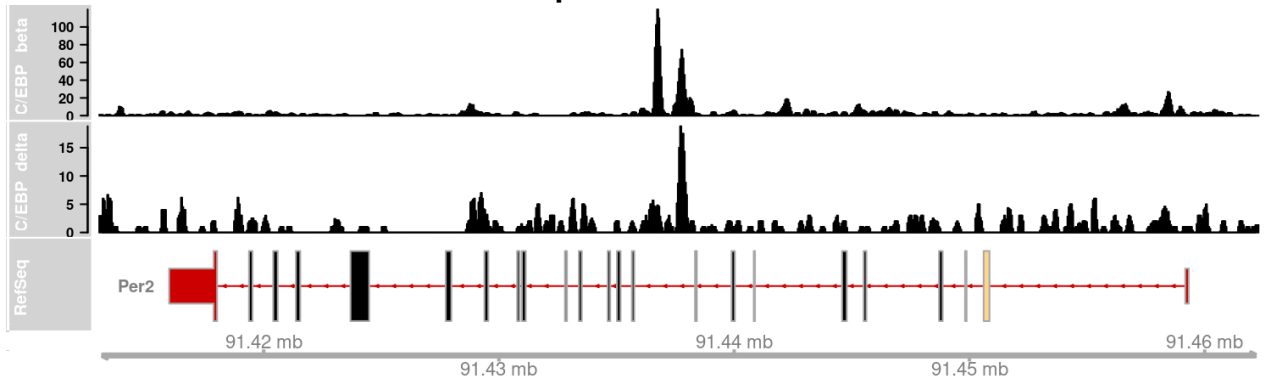

**C**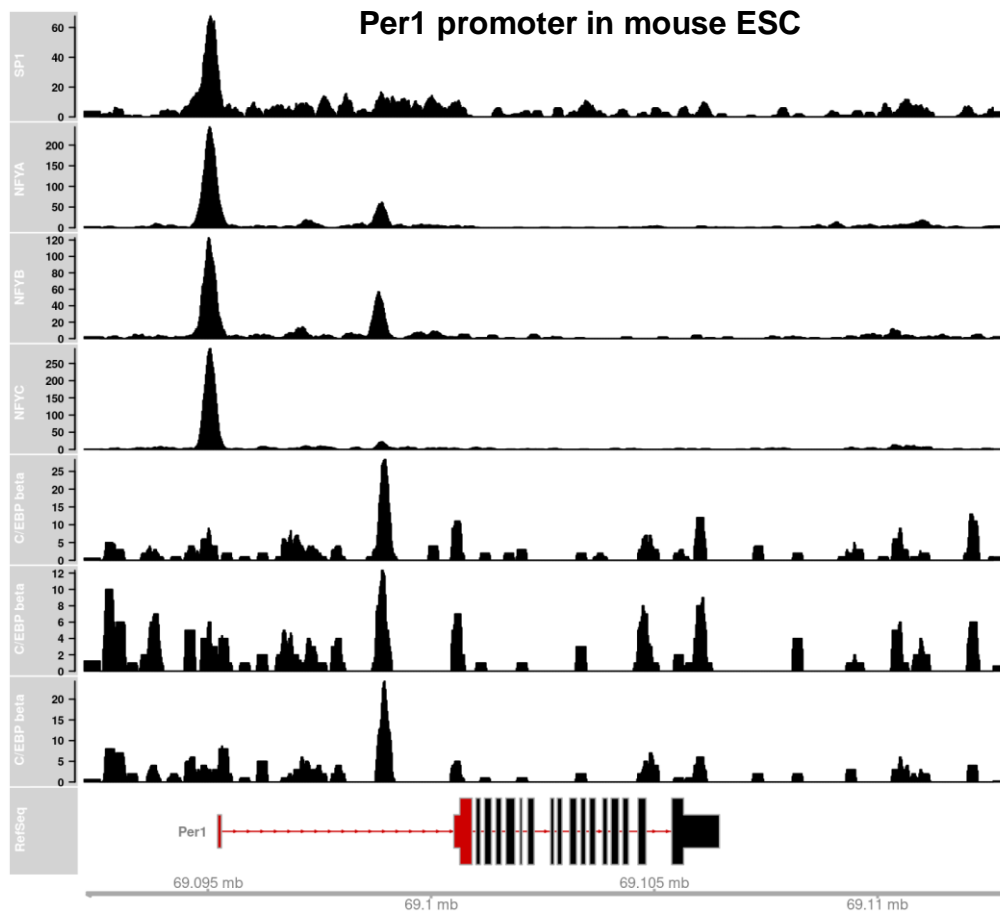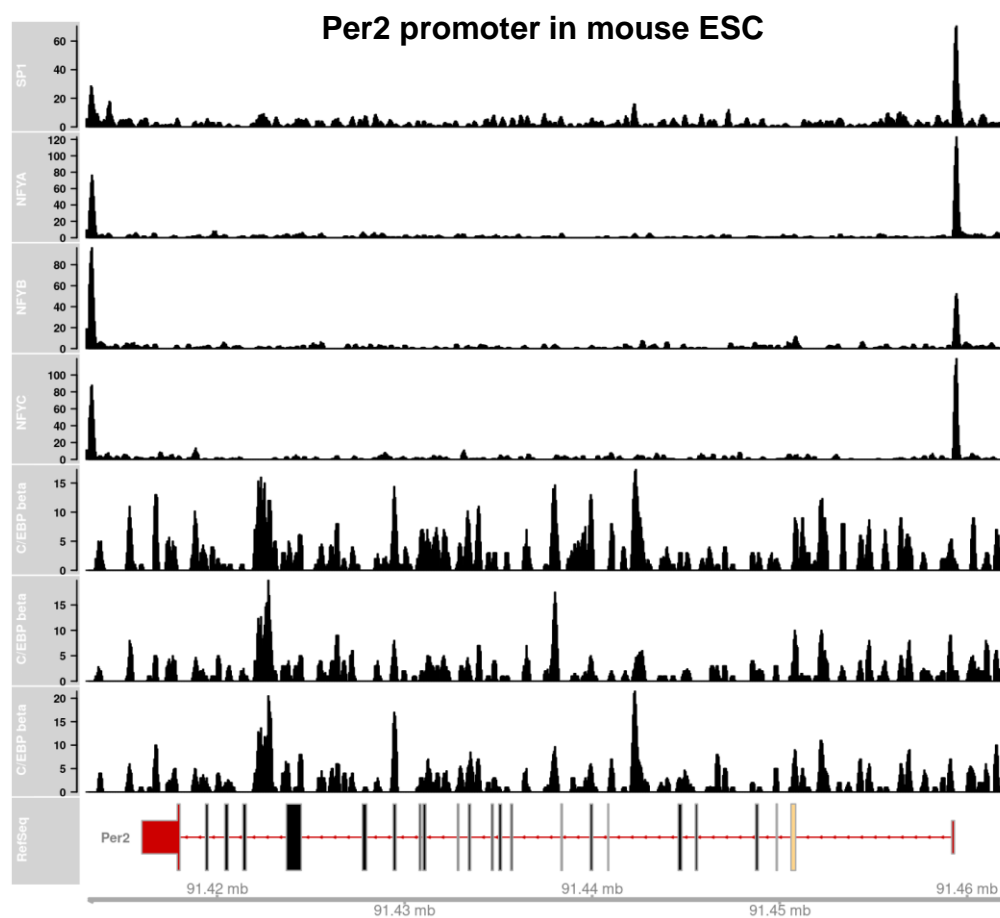

D

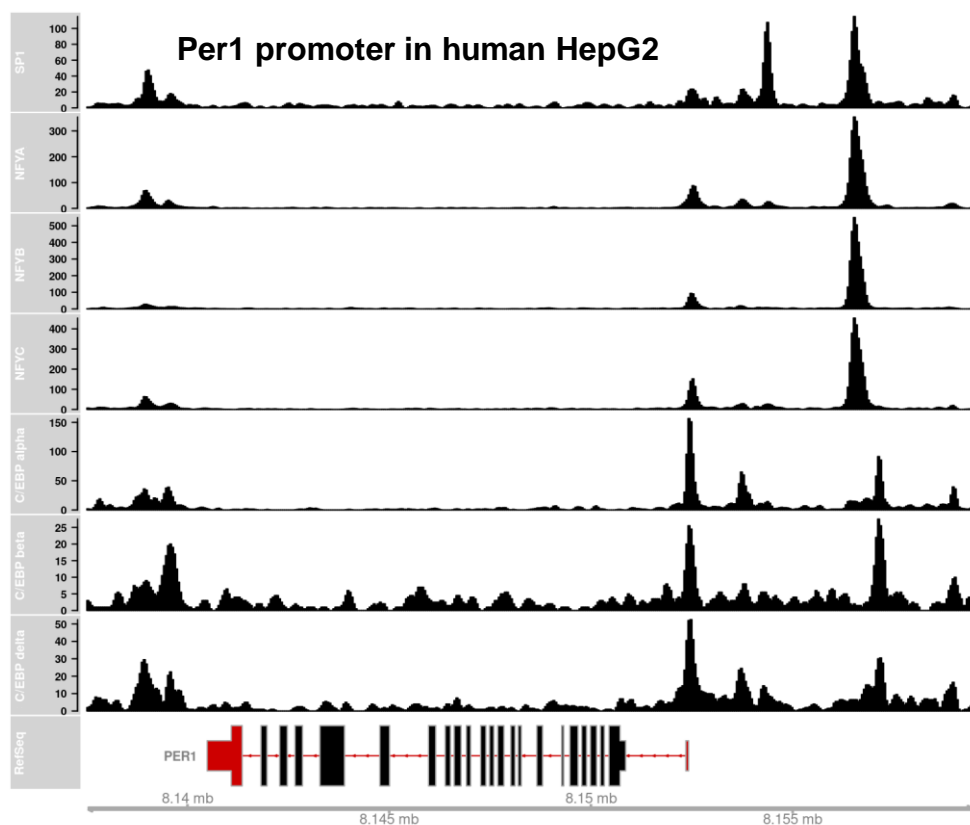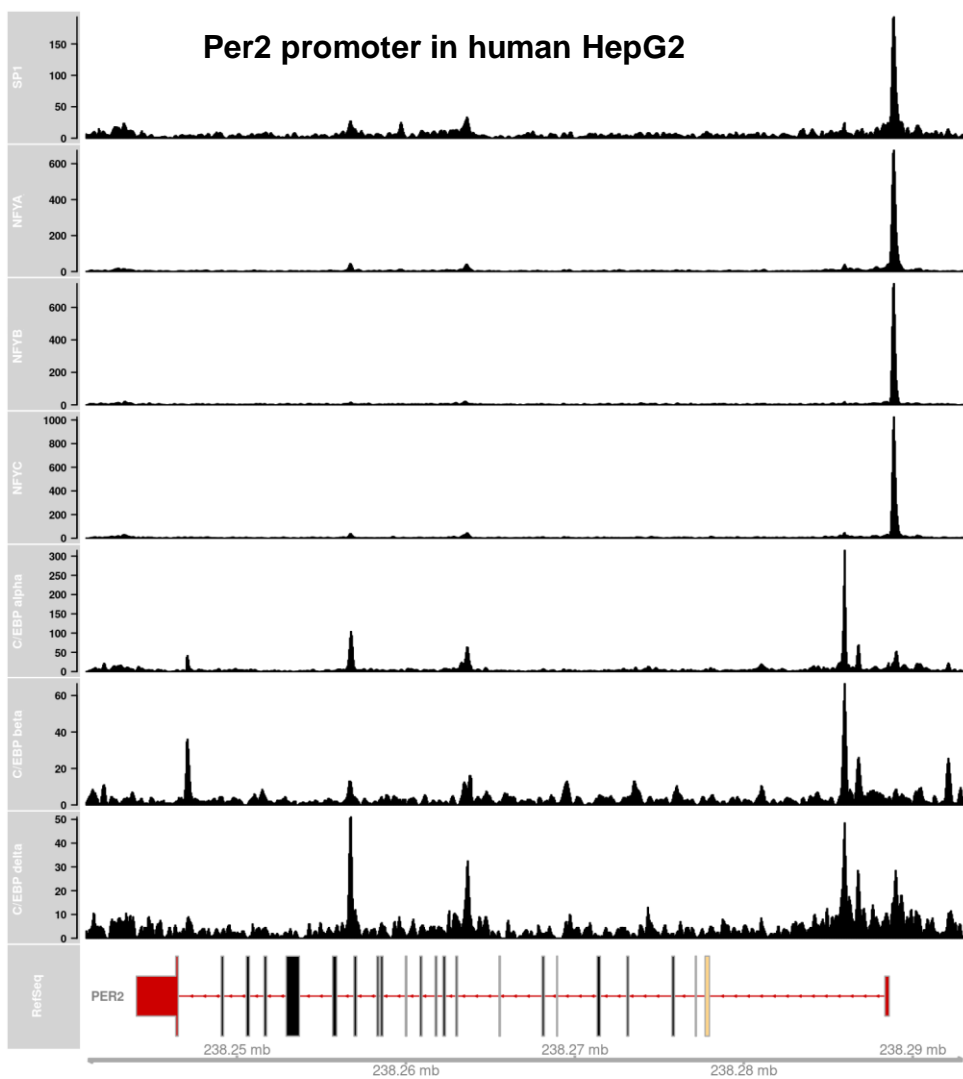

**Supplemental Figure 9. ChIP-Seq analysis of Per1 and Per2 promoter regions for NFY, SP1 and C/EBP transcription factors. (A)** Accession IDs from Encode (ENCFF) and GEO (GSE) databases for selected transcription factors. **(B)** Promoter analysis of mouse 3T3-L1 cells. **(C)** Promoter analysis of mouse embryonic stem cells (ESC). **(D)** Promoter analysis of human HepG2 cells.

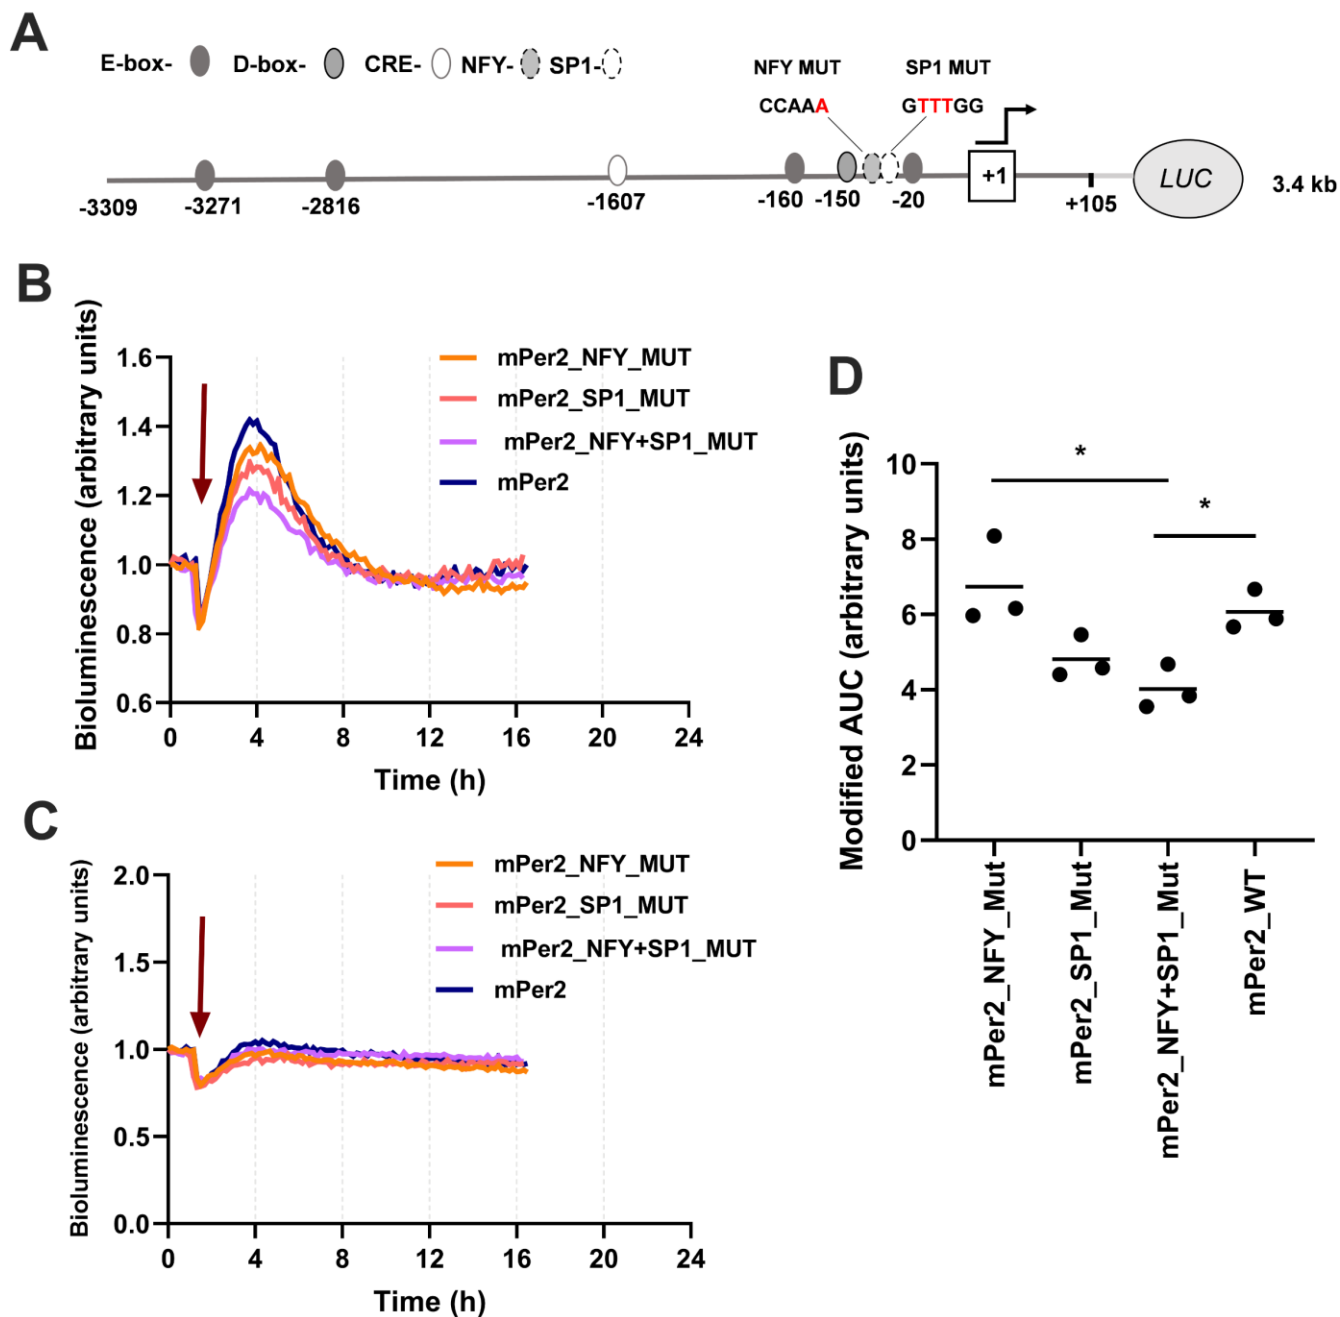

**Supplemental Figure 10. Insulin-inducible expression from the mPer2 promoter is NFY and SP1 dependent.** **(A)** Schematic representation of the mPer2 promoter luciferase reporter construct with the potential binding sites for NFY (CCAAT) and SP1 (GGGCGG) are shown using a dashed line. LUC: luciferase, +1 represent the transcriptional starting site. **(B and C)** Bioluminescence recordings of 3T3-L1 preadipocytes harboring the mPer2- or the mPer2-NFY-MUT/mPer2-SP1-MUT/mPer2-NFY+SP1-MUT promoter luciferase reporter construct (one representative experiment is shown). Cells were stimulated with either **(B)** 100 nM insulin (n=3 technical replicates) or **(C)** solvent (n=3 technical replicates) (time of stimulation indicated by the red arrow). **(D)** Quantification of area under the induction curve (AUC) (n=3 biological replicates). \*p<0.05, \*\*p<0.01, \*\*\*p<0.001 by one-way ANOVA with multiple comparison test.
